# Supplementary material for: The healthy exocrine pancreas contains preproinsulin-specific CD8 T cells that attack islets in type 1 diabetes
Source: PubMed Central journal article supplement — Sci Adv. 2020 Oct 16;6(42):eabc5586. doi: 10.1126/sciadv.abc5586 (PMC7567597; doi:10.1126/sciadv.abc5586), 2020-10-16
Supplement: abc5586_SM.pdf [file abc5586_SM.pdf]

[advances.sciencemag.org/cgi/content/full/6/42/eabc5586/DC1](https://advances.sciencemag.org/cgi/content/full/6/42/eabc5586/DC1)

## Supplementary Materials for

### **The healthy exocrine pancreas contains preproinsulin-specific CD8 T cells that attack islets in type 1 diabetes**

Christine Bender, Teresa Rodriguez-Calvo, Natalie Amirian, Ken T. Coppieters, Matthias G. von Herrath\*

\*Corresponding author. Email: [matthias@lji.org](mailto:matthias@lji.org)

Published 16 October 2020, *Sci. Adv.* **6**, eabc5586 (2020)

DOI: [10.1126/sciadv.abc5586](https://doi.org/10.1126/sciadv.abc5586)

#### **This PDF file includes:**

Supplementary Methods  
Figs. S1 to S6  
Tables S1 to S3

## **Supplementary Methods:**

### **Flow cytometry**

Peripheral blood mononuclear cells (PBMCs) were thawed in RPMI (11835-030 Life Technologies) (supplemented with 15 U Benzoylarginine L-glutamate) at 37°C. After counting, 100 µl of  $2 \times 10^6$  cells/mL were added per well to a sterile 96-well round bottom plate and stained with a live/dead aqua dye (L34957, Life Technologies) for 30 minutes at room temperature in the dark, followed by washing with PBS. PBMCs were incubated with the protein kinase inhibitor dasatinib (D3307, LC laboratories) at a final concentration of 50 nM for 30 minutes at 37°C. After washing with PBS, PBMCs were stained with 1 µg APC-labeled tetramer (PPI<sub>15-24</sub> and CMV<sub>495-503</sub>) for 10 minutes at 37°C. Subsequently, PBMCs were stained with biotinylated anti-APC antibody (1/1000, clone APC003, IgG1, BioLegend) for 30 minutes at 4°C. After washing with PBS, AF647, or BV421-labeled streptavidin (1/1000, S32357 Life technologies, 405225 Bio Legend) was added to the cells. Stained PBMCs were kept on ice and in the dark until the next step or acquisition with LSR II (BD Biosciences). Finally, mouse CD8-AF488 (1/100, clone RFT8, Sothen Biotech 9536-30 and mouse CD3-PE (1/100, clone OKT3e, Bioscience 12-0037-42) monoclonal antibodies were added to the cells for 30 minutes at 4°C to stain T lymphocytes.

### **Immunofluorescence staining of PBMCs**

PBMCs ( $10^6$ ) were washed in PBS and blocked with 1% BSA. Afterward, cells were prepared on Superfrost plus slides using the Shandon Cytospin 4 (Fisher Scientific). After air-drying overnight in a desiccation chamber, cells were incubated with 1 µg APC labeled PPI<sub>15-24</sub> tetramer overnight at 4°C. The next day, cells were fixed with 1% paraformaldehyde (PFA) for 15 minutes at room temperature. After blocking with TBS/Protease inhibitor/2% Goat serum for 30 minutes at room temperature, cells were incubated with purified mouse anti-APC antibody (1/50, Biolegend) for 12 hours at room temperature. Subsequently, the goat anti-mouse AF647 antibody was added for 1h. Slides were incubated with anti-CD8-AF488 (1/100, clone RFT8, Sothen Biotech 9536-30) for 1 hour at room temperature. Nuclei were counterstained with Hoechst (1/5000, Life Technologies), and coverslips were mounted using Prolong Gold antifade mounting medium (Invitrogen). Slides were examined using a laser scanning Olympus FV10i confocal microscope. Images were captured with a 60x objective.

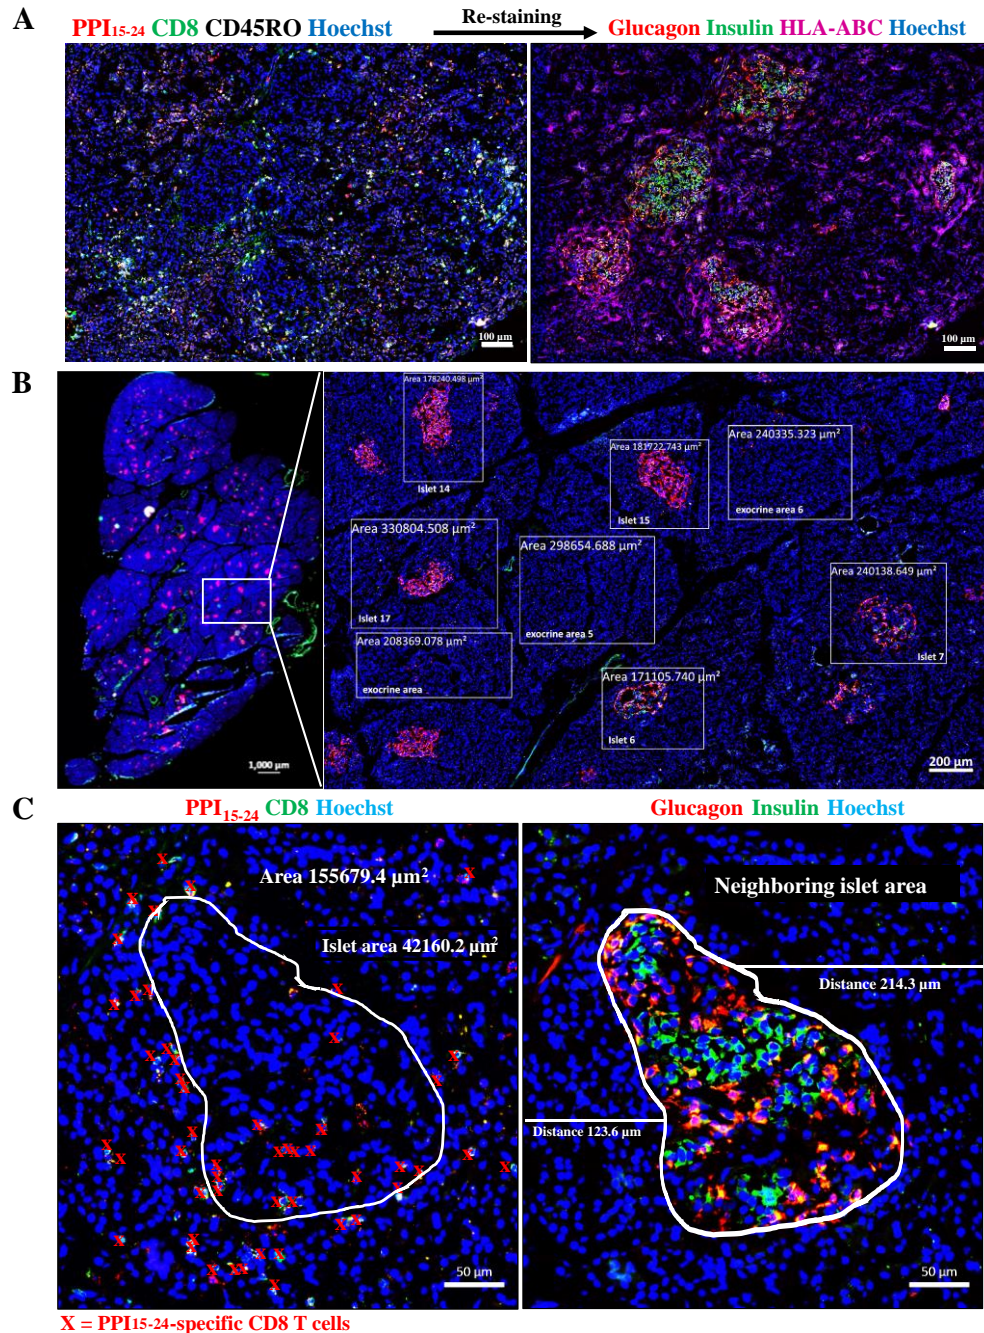

Fig. S1. **Representative immunofluorescence images of a pancreas section from a donor with T1D** (#6052, one year of disease duration). **A**) Re-staining strategy: Left image represents the tetramer staining before chemical fluorophore inactivation with H<sub>2</sub>O<sub>2</sub>. The right image represents the same tissue sections re-stained for insulin (green), glucagon (red), and MHC class I (magenta). **B**) Different exocrine regions and islets (white squares) across the pancreas section were randomly picked to quantify PPI<sub>15-24</sub>-specific CD8<sup>+</sup> T cells. **C**) PPI<sub>15-24</sub>-specific CD8<sup>+</sup> T cells were counted manually, and the density was calculated per mm<sup>2</sup>. Scale bar 50 μm. Images were taken with the AxioScan.Z1 slide scanner (Zeiss, 20x magnification).

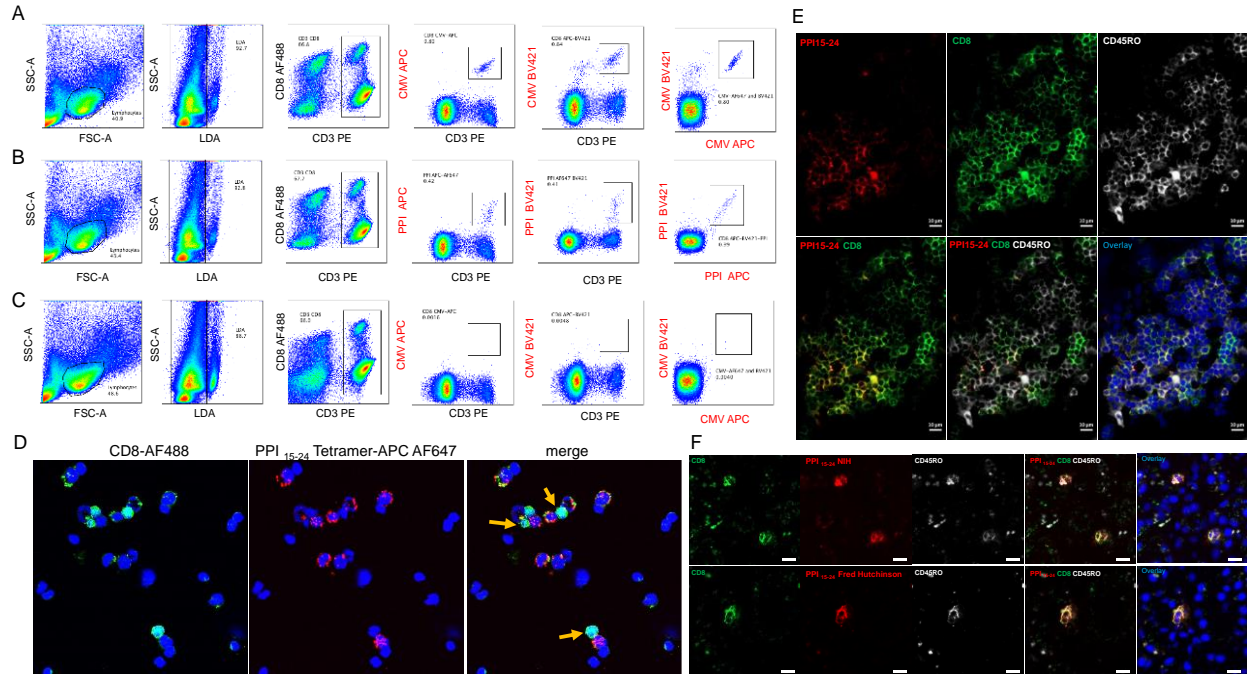

**Fig. S2. Tetramer quality control.** **A)** PBMCs spiked with CMV<sub>495-503</sub> specific T cell clones were stained for Aqua Live-Dead (LDA), CD3, CD8, and CMV tetramer-APC. Purified mouse anti-APC antibody plus goat anti-mouse BV421 were added for double fluorescent detection of antigen-specific cells. **B)** A similar strategy was applied for PPI<sub>15-24</sub>-specific cells. **C)** CMV tetramer staining was performed in PBMCs from a negative donor. **D)** PBMCs were spun onto a microscopy slide with Cytospin. Immunofluorescence staining of human PBMCs with AF647-labeled PPI<sub>15-24</sub> tetramer in combination with anti-CD8-AF488. Yellow arrows indicate PPI-negative CD8-positive T cells (merge image). Nuclei were counterstained with Hoechst. The image was captured with a 40x objective. **E)** Representative immunofluorescence staining of PPI<sub>15-24</sub> specific CD8<sup>+</sup> CD45RO<sup>+</sup> T cells on a PLN section from a donor with T1D (#6046, eight years of disease duration). **F)** PPI<sub>15-24</sub> tetramers labeled with APC from NIH and Fred Hutchinson were compared by immunofluorescence staining in combination with CD8-AF488 (green) and CD45RO-AF594 (white) on a pancreas section from a donor with T1D (#6224, disease duration 1.5 years). Scale bar 10  $\mu$ m.

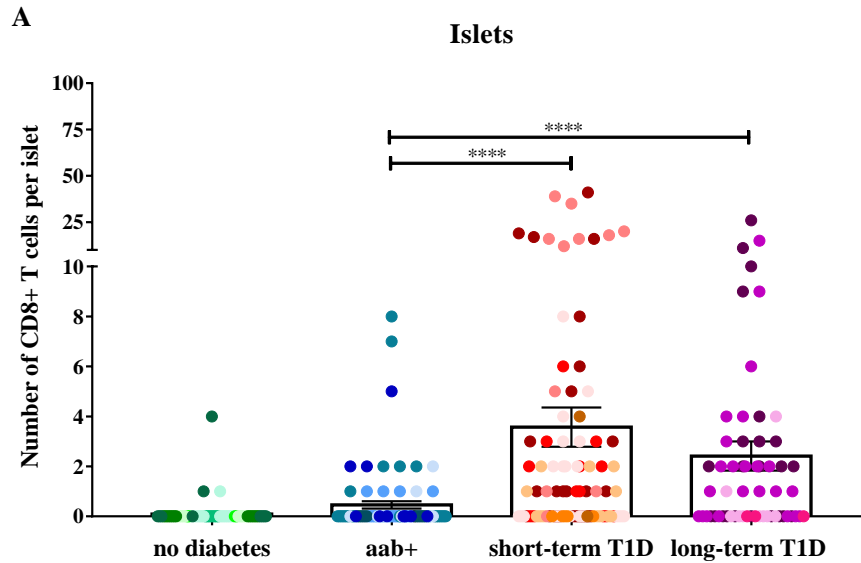

**B**

|                                                       | no diabetes      | aab+             | short-term T1D   | long-term T1D    |
|-------------------------------------------------------|------------------|------------------|------------------|------------------|
| <b>Islets <i>n</i></b>                                | <b>63</b>        | <b>83</b>        | <b>98</b>        | <b>58</b>        |
| <b>CD8+ islets<br/><i>n</i> (%)</b>                   | <b>3 (5.8)</b>   | <b>15 (18.1)</b> | <b>48 (49.0)</b> | <b>31 (53.4)</b> |
| <b>1 CD8 T cell<br/>per islet <i>n</i><br/>(%)</b>    | <b>2 (3.9)</b>   | <b>6 (7.3)</b>   | <b>12 (12.2)</b> | <b>5 (8.6)</b>   |
| <b>≥ 2 CD8 T<br/>cells per<br/>islet <i>n</i> (%)</b> | <b>1 (1.9)</b>   | <b>9 (10.8)</b>  | <b>36 (36.8)</b> | <b>26 (44.8)</b> |
| <b>CD8<br/>negative<br/>islets <i>n</i> (%)</b>       | <b>60 (94.2)</b> | <b>68 (81.9)</b> | <b>50 (51.0)</b> | <b>27 (46.6)</b> |

**Fig. S3. Higher total numbers of CD8+ T cells in islets from donors with T1D irrespective of disease duration compared with donors without diabetes.** Islets were randomly selected from pancreas sections of donors without diabetes ( $n=63$ ), aab+ ( $n=83$ ), and T1D ( $n=156$ ). **A)** Higher numbers of CD8+ T cells were found in donors with T1D ( $p<0.0001$ ) compared to donors with aab+ irrespective of disease duration. The total number of CD8+ T cells is displayed per islet. Bars represent the mean  $\pm$  SEM values. Every color represents a donor. For statistical analysis, non-parametric Kruskal-Wallis test followed by Dunn multiple comparison test was used to determine significance: \*\*\*\*  $p<0.0001$ . **B)** The table summarizes the numbers of islets infiltrated with CD8 T cells per group. The percentages of islets positive for 1 CD8+ T cell or  $\geq 2$  CD8+ T cells were calculated.



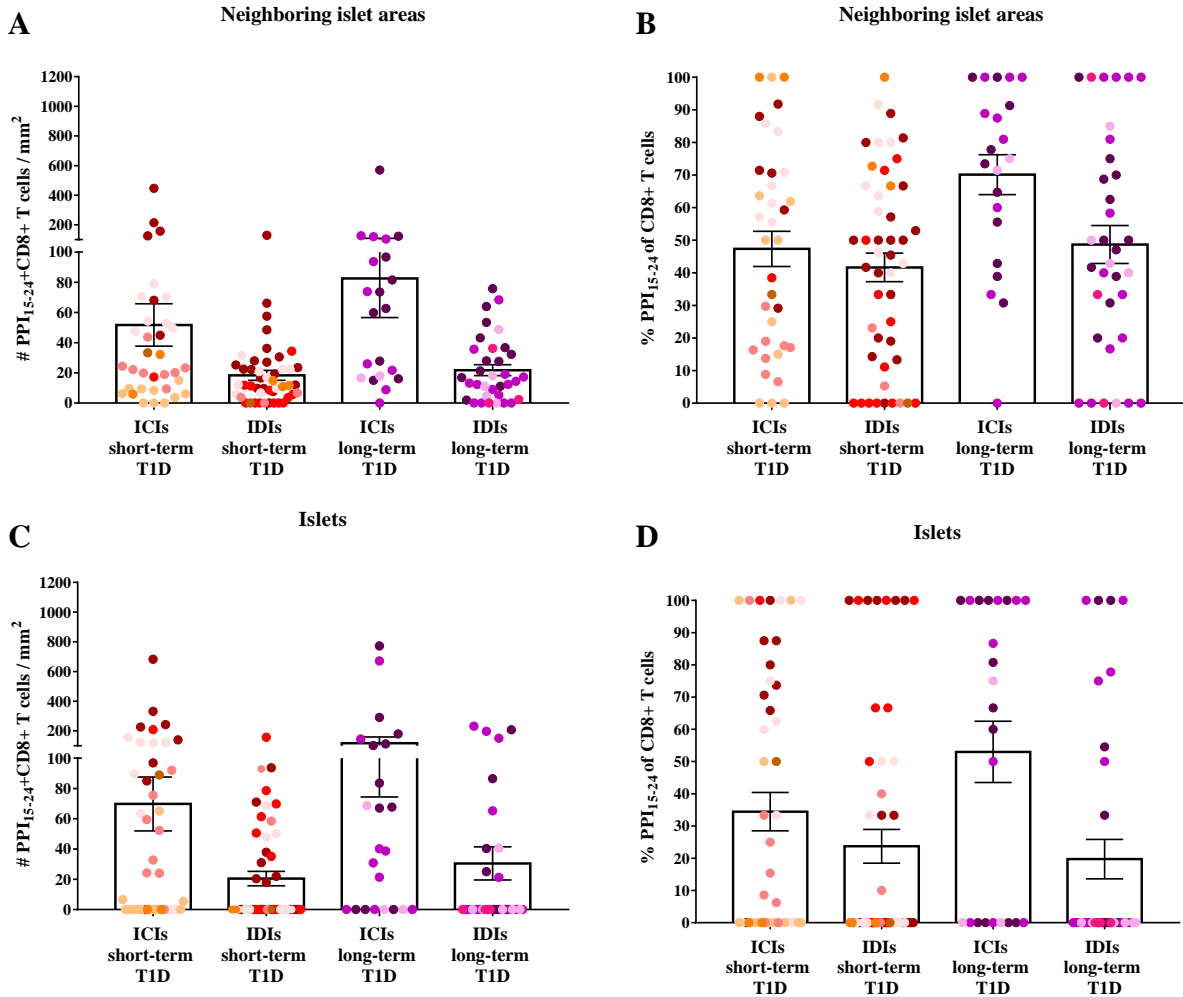

**Fig. S4. PPI<sub>15-24</sub>-specific CD8<sup>+</sup> T cell infiltration or retention in the islets depends on the presence of insulin irrespective of disease duration.** ICIs (n=69) and IDIs (n=87) from donors with short disease duration (n=7) and long-term T1D (n=4) were analyzed for the presence of PPI<sub>15-24</sub>-specific CD8<sup>+</sup> T cells. Every dot represents **A+B**), a neighboring islet area to ICIs (n=56), and IDIs (n=81) or **C+D**) an islet. Bars represent the mean ± SEM numbers (**A+C**) and frequencies (**B+D**) of PPI<sub>15-24</sub>-specific CD8 T cells/mm<sup>2</sup> in donors with short-term or long-term disease duration. Every color represents a donor. For statistical analysis, non-parametric Kruskal-Wallis test followed by Dunn multiple comparison test was used.

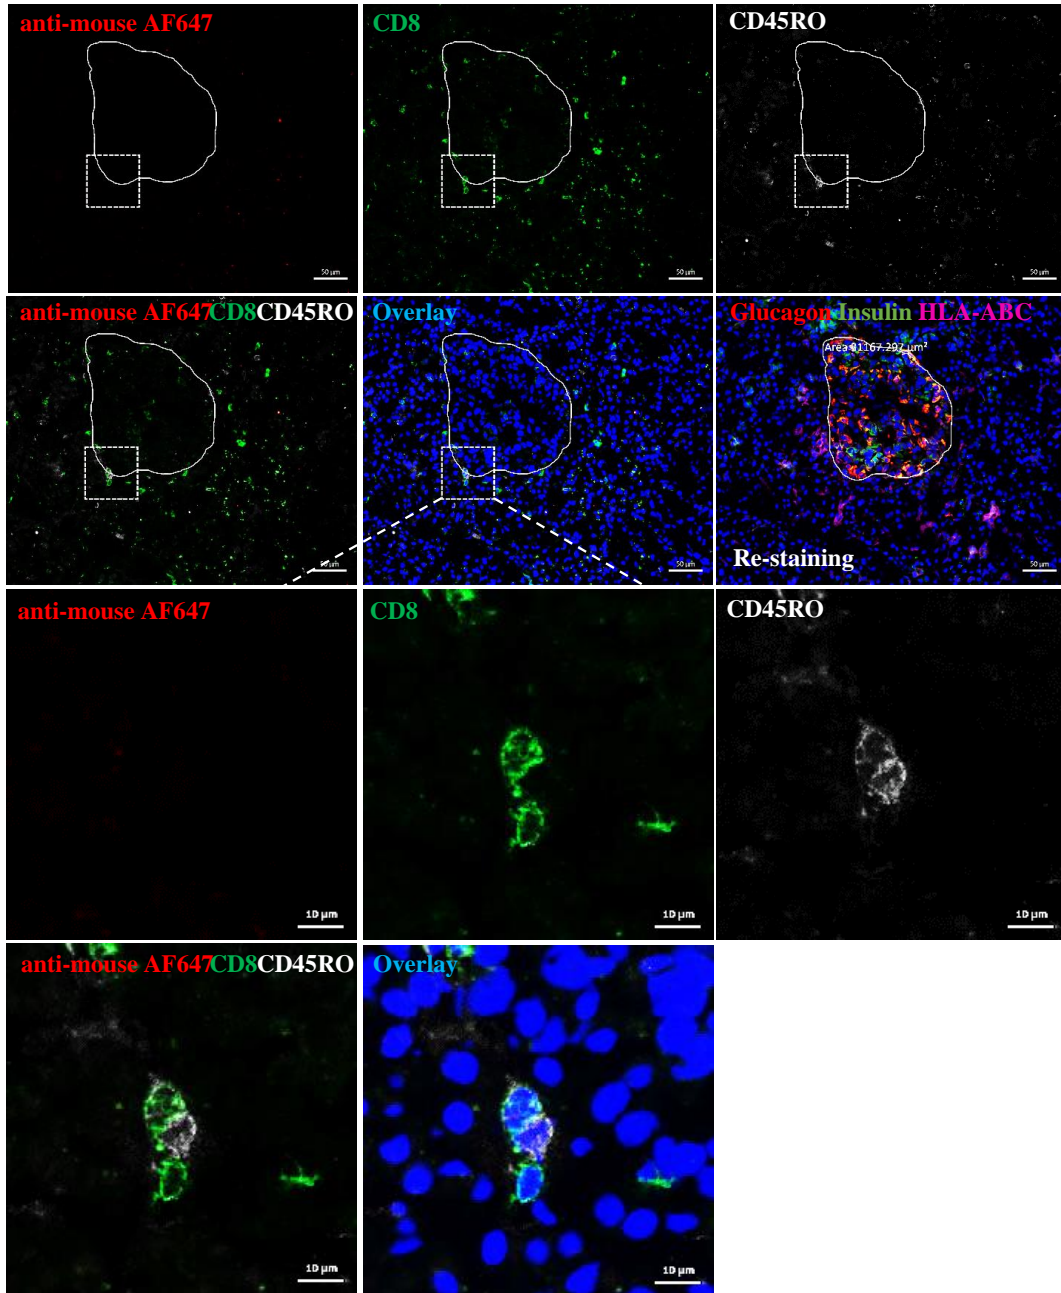

**Fig. S5. PPI<sub>15-24</sub> staining control.** Complimentary to Fig. S1. Immunofluorescence staining on a consecutive section without tetramer, including CD8-AF488 (green), CD45RO-AF594 (white), and secondary antibody anti-mouse AF647 as a staining control for the tetramer.

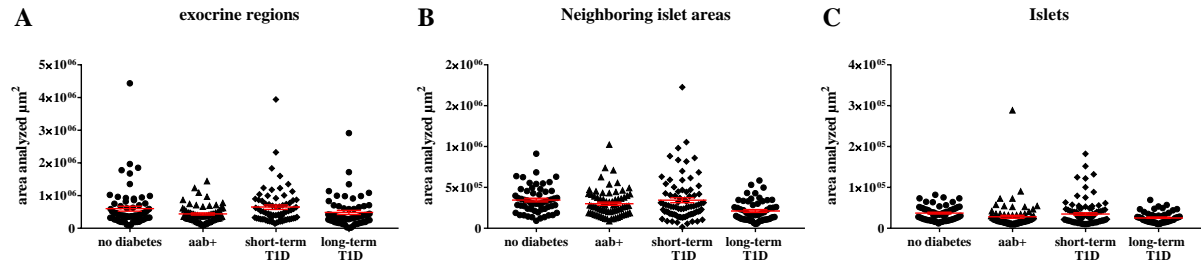

**Fig. S6. Analyzed area size.** The analyzed area size is shown in  $\mu\text{m}^2$  for each group: no diabetes (donors without diabetes), aab+ (autoantibody-positive donors), and T1D donors with short and long disease duration. Every dot represents an **A**) exocrine region, **B**) neighboring islet area or, **C**) islet area ( $\geq 10\,000$   $\mu\text{m}^2$ ). Red lines represent the mean size values  $\pm$  SEM for different groups.



| <b>NO DIABETES</b> | <b>islets (n)</b> | <b>Neighboring area (n)</b> | <b>exocrine regions (n)</b> |
|--------------------|-------------------|-----------------------------|-----------------------------|
| <b>6232</b>        | 10                | 9                           | 10                          |
| <b>6271</b>        | 8                 | 7                           | 7                           |
| <b>6295</b>        | 16                | 16                          | 21                          |
| <b>6335</b>        | 15                | 12                          | 13                          |
| <b>6377</b>        | 4                 | 4                           | 3                           |
| <b>6386</b>        | 10                | 9                           | 15                          |
| <b>Total</b>       | <b>63</b>         | <b>57</b>                   | <b>69</b>                   |

| <b>AAB+</b>  | <b>islets (n)</b> | <b>Neighboring area (n)</b> | <b>exocrine regions (n)</b> |
|--------------|-------------------|-----------------------------|-----------------------------|
| <b>6123</b>  | 12                | 12                          | 8                           |
| <b>6151</b>  | 24                | 15                          | 12                          |
| <b>6154</b>  | 26                | 25                          | 27                          |
| <b>6171</b>  | 11                | 11                          | 9                           |
| <b>6429</b>  | 10                | 10                          | 7                           |
| <b>Total</b> | <b>83</b>         | <b>73</b>                   | <b>63</b>                   |

| <b>T1D</b>   | <b>islets (n)</b> |             | <b>Neighboring area (n)</b> | <b>exocrine regions (n)</b> |
|--------------|-------------------|-------------|-----------------------------|-----------------------------|
|              | <b>ICIs</b>       | <b>IDIs</b> |                             |                             |
| <b>6046</b>  | 9                 | 14          | 23                          | 22                          |
| <b>6052</b>  | 8                 | 20          | 25                          | 20                          |
| <b>6070</b>  | 11                | 12          | 22                          | 24                          |
| <b>6088</b>  | 0                 | 3           | 3                           | 7                           |
| <b>6113</b>  | 1                 | 13          | 13                          | 15                          |
| <b>6209</b>  | 8                 | 3           | 11                          | 7                           |
| <b>6224</b>  | 12                | 12          | 16                          | 12                          |
| <b>6268</b>  | 3                 | 6           | 7                           | 5                           |
| <b>6456</b>  | 14                | 0           | 10                          | 9                           |
| <b>6367</b>  | 2                 | 3           | 5                           | 6                           |
| <b>6342</b>  | 1                 | 1           | 2                           | 2                           |
| <b>Total</b> | <b>69</b>         | <b>87</b>   | <b>137</b>                  | <b>129</b>                  |
|              | <b>156</b>        |             |                             |                             |

|              |            |            |            |
|--------------|------------|------------|------------|
| <b>Total</b> | <b>302</b> | <b>267</b> | <b>261</b> |
|--------------|------------|------------|------------|

**Table S1. Numbers of analyzed areas.** Numbers are presented for each donor and donor group. A total of 302 islets, 267 neighboring areas, and 261 exocrine regions were analyzed. ICIs =insulin-containing islets, IDIs= insulin-deficient islets. IDIs were not present in tissue samples from non-diabetic and aab+ donors.

|                       | no diabetes                                                                                  | aab+                                                                                         | T1D short-term                                                                               | T1D long-term                                                                                   |
|-----------------------|----------------------------------------------------------------------------------------------|----------------------------------------------------------------------------------------------|----------------------------------------------------------------------------------------------|-------------------------------------------------------------------------------------------------|
| Total Islets (n)      | 63                                                                                           | 83                                                                                           | 156                                                                                          |                                                                                                 |
| CD8+ islets (%)       |  6232 (3.9) |  6123 (0)   |  6052 (9.6) |  6046 (10.3) |
|                       |  6271 (0)   |  6151 (7.2) |  6113 (5.1) |  6070 (8.3)  |
|                       |  6295 (1.9) |  6154 (4.9) |  6209 (6.4) |  6088 (0)    |
|                       |  6335 (0)   |  6171 (2.4) |  6224 (5.8) |  6268 (1.3)  |
|                       |  6377 (0)   |  6429 (3.6) |  6342 (0.6) |                                                                                                 |
|                       |  6386 (0)   |                                                                                              |  6367 (0)   |                                                                                                 |
|                       |                                                                                              |                                                                                              |  6456 (3.2) |                                                                                                 |
| Total CD8+ islets (%) | 5.8                                                                                          | 18.1                                                                                         | 50.6                                                                                         |                                                                                                 |

**Table S2. Percentage of islets infiltrating with CD8+ T cells.** Islets were randomly selected from pancreas sections of donors without diabetes (n=63), aab+ (n=83), and T1D (n=156). In the T1D group, 50.6 % of all selected islets were infiltrated with CD8+ T cells. In comparison, we detected CD8+ T cells in 18.1% of all analyzed islets from aab+, and 5.8% from non-diabetic donors. Every color represents a donor. aab+= autoantibody-positive, T1D short-term ( $2 \leq$  years), T1D long-term (2-8 years).

| Donor Type            | nPOD case ID | Gender | Age (y) | Race             | BMI  | T1D Duration (y) | Time in ICU (days) | C-peptide (ng/ml) | Clinical History        | Regions analyzed |
|-----------------------|--------------|--------|---------|------------------|------|------------------|--------------------|-------------------|-------------------------|------------------|
| No Diabetes           | 6232         | Female | 14      | Caucasian        | 20.8 | -                | 3.03               | 19.5              | Negative                | Body             |
| No Diabetes           | 6271         | Male   | 17      | Caucasian        | 24.4 | -                | 0.48               | 11.47             | Negative                | Tail             |
| No Diabetes           | 6295         | Female | 47      | African American | 30.4 | -                | 4.1                | 10.91             | Negative                | Tail             |
| No Diabetes           | 6335         | Male   | 18.8    | Multiracial      | 23.6 | -                | 4.11               | 8.85              | Negative                | Body             |
| No Diabetes           | 6377         | Male   | 9.2     | African American | 16.6 | -                | 8.17               | 1.5               | Negative                | Body             |
| No Diabetes           | 6386         | Male   | 14      | Caucasian        | 23.9 | -                | 2.34               | 1.12              | Negative                | Body             |
| Autoantibody-positive | 6123         | Female | 23.2    | Caucasian        | 17.6 | -                | 3.55               | 2.01              | GADA                    | Tail             |
| Autoantibody-positive | 6151         | Male   | 30      | Caucasian        | 24.2 | -                | 2.16               | 5.49              | GADA                    | Head, Tail       |
| Autoantibody-positive | 6154         | Female | 48.5    | Caucasian        | 24.5 | -                | 3.73               | <0.05             | GADA                    | Head, Body, Tail |
| Autoantibody-positive | 6171         | Female | 4.4     | Caucasian        | 14.8 | -                | 3.98               | 8.95              | GADA                    | Body             |
| Autoantibody-positive | 6429         | Male   | 22.1    | African American | 19.6 | -                | 6.9                | 2.25              | GADA, mIAA              | Tail, Body       |
| T1D                   | 6046         | Female | 18.8    | Caucasian        | 25.2 | 8                | 2.3                | <0.05             | IA2A, ZnT8A             | Head, Body, Tail |
| T1D                   | 6052         | Male   | 12      | African American | 20.3 | 1                | 1.84               | 0.18              | IA2A, mIAA              | Body, Tail       |
| T1D                   | 6070         | Female | 22.6    | Caucasian        | 21.6 | 7                | 4.85               | <0.05             | IA2A, mIAA              | Body, Tail       |
| T1D                   | 6088         | Male   | 31.2    | Caucasian        | 27.0 | 5                | 0.93               | <0.05             | GADA, IA2A, mIAA, ZnT8A | Tail             |
| T1D                   | 6113         | Female | 13.1    | Caucasian        | 24.8 | 1.58             | 5.1                | <0.05             | mIAA,                   | Head, Body       |
| T1D                   | 6209         | Female | 5       | Caucasian        | 15.9 | 0.25             | -                  | 0.1               | IA2A, mIAA, ZnT8A       | Tail             |
| T1D                   | 6224         | Female | 21      | Caucasian        | 22.8 | 1.5              | 3.34               | <0.05             | Negative                | Head, Body, Tail |
| T1D                   | 6268         | Female | 12      | Caucasian        | 26.6 | 3                | 3.38               | 0.05              | mIAA                    | Tail             |
| T1D                   | 6342         | Female | 14      | Caucasian        | 24.3 | 2                | 3.13               | 0.26              | IA2A, mIAA              | Head             |
| T1D                   | 6367         | Male   | 24      | Caucasian        | 25.7 | 2                | 4.62               | 0.39              | Negative                | Head             |
| T1D                   | 6456         | Female | 30.49   | African American | 30.1 | 0                | 1.91               | 10.33             | GADA, ZnT8A             | Tail, Body       |

**Table S3. Detailed donor information.** Age and duration of disease are expressed in years. BMI, body mass index. Time in the intensive care unit (ICU). mIAA, micro assay for insulin autoantibodies; GADA, glutamic acid decarboxylase 65 autoantibodies; IA-2A, the intracytoplasmic domain of the tyrosine phosphatase (IA-2) autoantibodies. ZnT8A, zinc transporter 8 autoantibodies.
